# Supplementary material
Source: PubMed Central journal article supplement (PMC10592331)
Supplement: NIHMS1925594-supplement-6.pdf [file NIHMS1925594-supplement-6.pdf]

**Supplementary Figure S4. Methylation profiles using quadratic programming vs. non-negative least-squares regression using the reference matrix described in Sun *et al.* (3).** Pearson's correlation coefficient and  $p$  values are presented at the bottom of this figure, showing the derived contributions from each of the 12 tissue types that could be assessed.
