# Supplementary material
Source: PubMed Central journal article supplement (PMC10592331)
Supplement: NIHMS1925594-supplement-7.pdf [file NIHMS1925594-supplement-7.pdf]

Figure S5

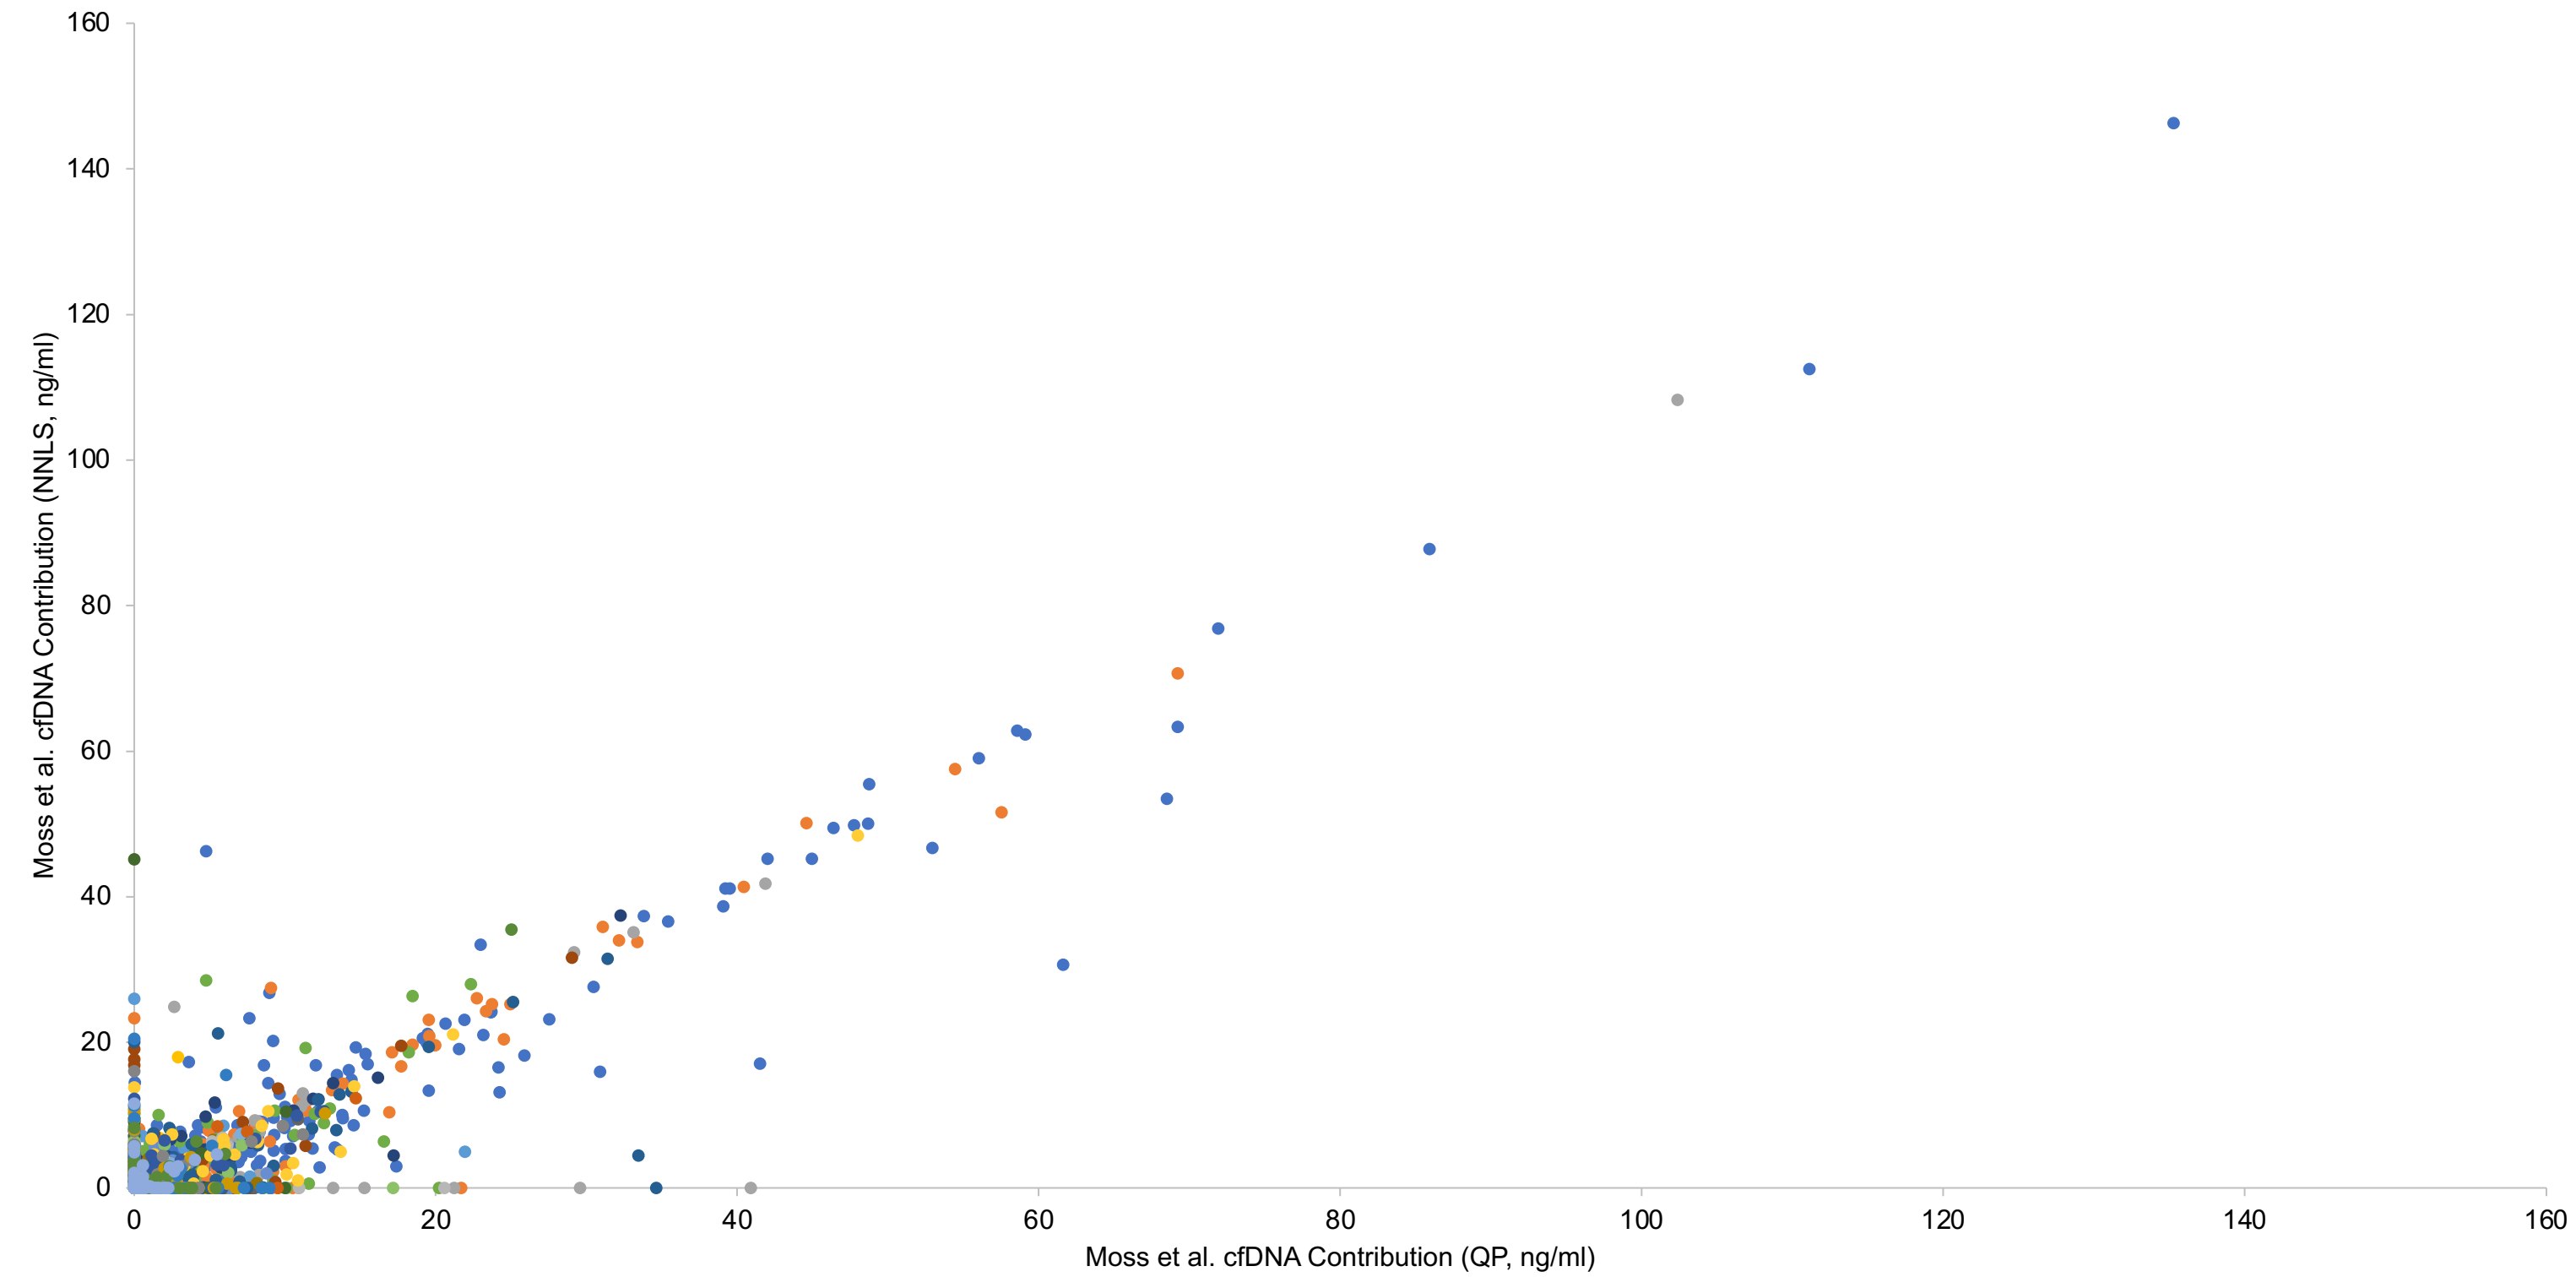

- Total Leukocytes
- Neutrophils
- Monocytes
- CD4 T Cells
- CD8 T Cells
- B Cells
- NK Cells
- Myeloid Progenitors
- Adipocytes
- Cortical Neurons
- Hepatocytes
- Lung Cells
- Pancreatic Acinar Cells
- Pancreatic Duct Cells
- Vascular Endothelial Cells
- Colon Epithelial Cells
- Left Atrium
- Bladder
- Breast
- Head and Neck/Larynx
- Kidney
- Prostate
- Thyroid
- Upper GI
- Uterus Cervix

| Tissue                | Total Leukocytes | Neutrophils | Monocytes   | CD4 T Cells | CD8 T Cells | B Cells     | NK Cells    | Myeloid Progenitor | Adipocytes  | Cortical Neurons | Hepatocytes | Lung Cells  | Pancreatic Acinar Cells | Pancreatic Duct Cells | Vascular Endothelial Cells | Colon Epithelial Cells | Left Atrium | Bladder     | Breast      | Head and Neck/Larynx | Kidney      | Prostate    | Thyroid     | Upper GI    | Uterus Cervix |
|-----------------------|------------------|-------------|-------------|-------------|-------------|-------------|-------------|--------------------|-------------|------------------|-------------|-------------|-------------------------|-----------------------|----------------------------|------------------------|-------------|-------------|-------------|----------------------|-------------|-------------|-------------|-------------|---------------|
| Pearson's Coefficient | 0.95             | 0.94        | 0.87        | 0.18        | 0.25        | 0.61        | 0.83        | 0.66               | 0.56        | 0.23             | 0.64        | 0.16        | 0.26                    | 0.03                  | 0.26                       | 0.90                   | 0.81        | 0.16        | 0.57        | 0.75                 | 0.50        | 0.31        | 0.19        | 0.89        | 0.36          |
| p Value               | $p < 0.001$      | $p < 0.001$ | $p < 0.001$ | $p = 0.004$ | $p < 0.001$ | $p < 0.001$ | $p < 0.001$ | $p < 0.001$        | $p < 0.001$ | $p < 0.001$      | $p < 0.001$ | $p = 0.012$ | $p < 0.001$             | $p = 0.631$           | $p < 0.001$                | $p < 0.001$            | $p < 0.001$ | $p = 0.011$ | $p < 0.001$ | $p < 0.001$          | $p < 0.001$ | $p < 0.001$ | $p = 0.003$ | $p < 0.001$ | $p < 0.001$   |

**Supplementary Figure S5. Methylation profiles using quadratic programming vs. non-negative least-squares regression using the reference matrix described in Moss *et al.* (43).** Pearson's correlation coefficient and  $p$  values are presented at the bottom of this figure, showing the derived contributions from each of the 25 tissue types that could be assessed.
