# Supplementary material
Source: PubMed Central journal article supplement (PMC10592331)
Supplement: NIHMS1925594-supplement-12.pdf [file NIHMS1925594-supplement-12.pdf]

# Figure S10

**A.** Buffy coat Bisulfite Sequencing Data Mixed with Liver Bisulfite Sequencing Data

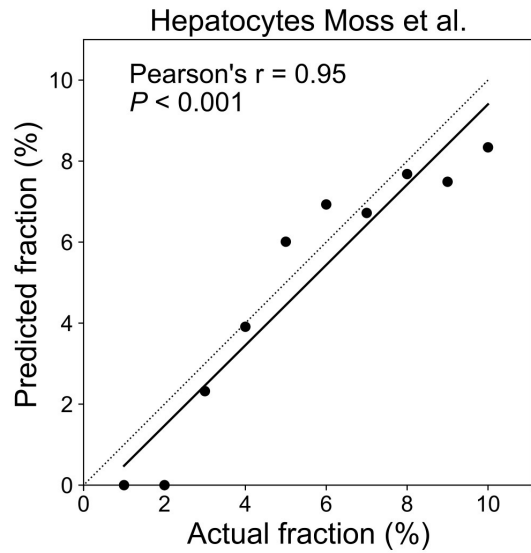

**B.** Buffy coat Bisulfite Sequencing Data Mixed with Lung Bisulfite Sequencing Data

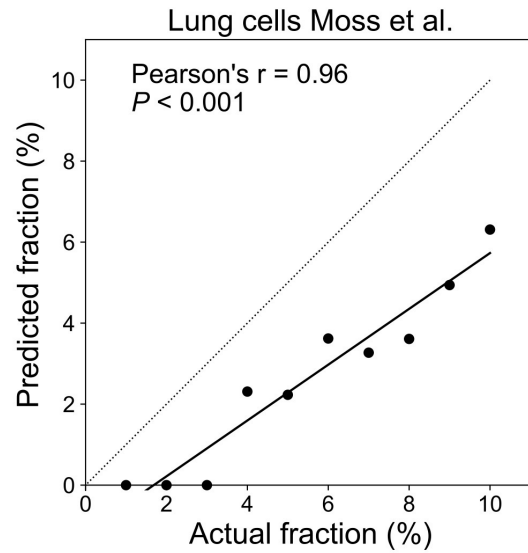

**C.** Buffy coat Bisulfite Sequencing Data Mixed with Colon Epithelial Cell Bisulfite Sequencing Data

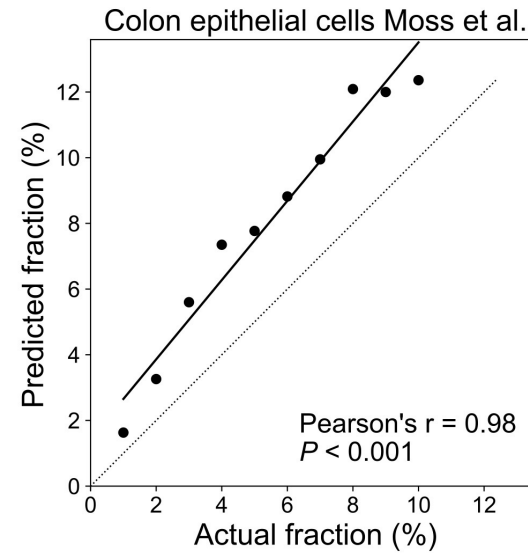

**D.** Buffy coat Bisulfite Sequencing Data Mixed with Left Atrium Bisulfite Sequencing Data

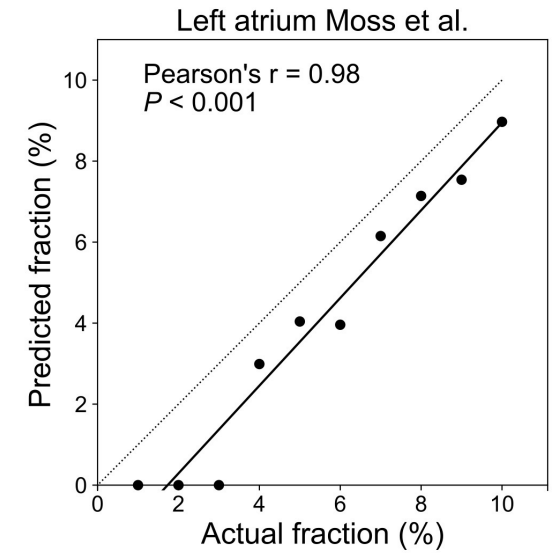

**Supplementary Figure 10. *In silico* mixing experiments (N = 10) of buffy coat bisulfite sequencing data with liver (A), lung (B), colon epithelial cell (C), and left atrium (D) bisulfite sequencing data deconvoluted using the Moss *et al.* (43) reference matrix and quadratic programming shows excellent agreement between predicted and actual fractional contribution.**
